# Supplementary material
Source: PubMed Central journal article supplement (PMC2788682)
Supplement: NIHMS130150-supplement-1_si_001.pdf [file NIHMS130150-supplement-1_si_001.pdf]

## Supporting Information

### Modifications at the C-Terminus to Improve Py/Im Polyamide Activity in Cell Culture

Claire S. Jacobs and Peter B. Dervan

#### Supporting Information Table of Contents:

|                                                                                   |    |
|-----------------------------------------------------------------------------------|----|
| Table SI 1: MALDI-ToF and Purity Data                                             | S2 |
| Table SI 2: Tm Data for <b>1-44</b>                                               | S3 |
| Figure SI 1: Cell Viability Data for <b>39-44</b> in LNCaP cells                  | S4 |
| Figure SI 2A and 2B: Cell Viability Data for <b>45-48</b> in U251 and LNCaP cells | S5 |

|          |            |        |          |           |        |
|----------|------------|--------|----------|-----------|--------|
| Compound | MALDI-ToF: | Purity | Compound | MALDI-ToF | Purity |
|----------|------------|--------|----------|-----------|--------|

| Number    | Expected (M+H <sup>+</sup> );<br>Observed (M+H <sup>+</sup> ) | (HPLC,<br>310 nm) | Number    | Expected (M+H):<br>Observed (M+H): | (HPLC,<br>310 nm) |
|-----------|---------------------------------------------------------------|-------------------|-----------|------------------------------------|-------------------|
| <b>1</b>  | 1274.49; 1274.51                                              | 99.3              | <b>23</b> | 1237.59; 1237.48                   | 95.0              |
| <b>2</b>  | 1246.50; 1246.81                                              | 99.3              | <b>24</b> | 1209.59; 1209.89                   | 95.6              |
| <b>3</b>  | 1231.49; 1231.77                                              | 99.7              | <b>25</b> | 1194.58; 1194.53                   | 100.0             |
| <b>4</b>  | 1175.43; 1175.61                                              | 98.7              | <b>26</b> | 1138.52; 1138.50                   | 99.7              |
| <b>5</b>  | 1191.42; 1191.38                                              | 97.2              | <b>27</b> | 1154.51; 1154.62                   | 96.8              |
| <b>6</b>  | 1394.52; 1394.46                                              | 98.0              | <b>28</b> | 1357.61; 1357.59                   | 98.8              |
| <b>7</b>  | 1379.50; 1379.72                                              | 99.3              | <b>29</b> | 1342.60; 1342.55                   | 99.6              |
| <b>8</b>  | 1323.44; 1323.52                                              | 99.9              | <b>30</b> | 1286.64; 1286.59                   | 99.0              |
| <b>9</b>  | 1323.44; 1323.44                                              | 95.6              | <b>31</b> | 1286.54; 1286.56                   | 96.1              |
| <b>10</b> | 1297.44; 1297.48                                              | 95.9              | <b>32</b> | 1260.54; 1260.63                   | 95.3              |
| <b>11</b> | 1319.42; 1319.52 <sup>a</sup>                                 | 97.2              | <b>33</b> | 1260.54; 1260.51                   | 96.4              |
| <b>12</b> | 1238.58; 1238.51                                              | 96.5              | <b>34</b> | 1238.58; 1238.56                   | 99.0              |
| <b>13</b> | 1210.59; 1210.76                                              | 98.1              | <b>35</b> | 1210.59; 1210.59                   | 98.0              |
| <b>14</b> | 1195.58; 1195.57                                              | 98.7              | <b>36</b> | 1195.58; 1195.56                   | 99.3              |
| <b>15</b> | 1139.51; 1139.49                                              | 98.8              | <b>37</b> | 1139.51; 1139.77                   | 95.1              |
| <b>16</b> | 1155.51; 1155.83                                              | 98.4              | <b>38</b> | 1155.51; 1155.40                   | 97.4              |
| <b>17</b> | 1358.60; 1358.66                                              | 97.8              | <b>39</b> | 1358.60; 1358.70                   | 95.4              |
| <b>18</b> | 1343.59; 1343.76                                              | 99.9              | <b>40</b> | 1343.59; 1343.52                   | 100.0             |
| <b>19</b> | 1287.53; 1287.56                                              | 99.4              | <b>41</b> | 1287.53; 1287.60                   | 98.4              |
| <b>20</b> | 1287.53; 1287.73                                              | 97.6              | <b>42</b> | 1287.53; 1287.53                   | 95.9              |
| <b>21</b> | 1261.53; 1261.87                                              | 97.3              | <b>43</b> | 1261.53; 1261.56                   | 98.9              |
| <b>22</b> | 1261.53; 1261.51                                              | 98.8              | <b>44</b> | 1261.53; 1261.51                   | 96.2              |

**Table SI 1:** MALDI-ToF and purity data for compounds **1-44**. MALDI-ToF data gives calculated exact mass for (M+H<sup>+</sup>) and observed mass for (M+H<sup>+</sup>) for polyamides **1-10** and **12-44**. <sup>a</sup> MALDI-ToF data for **11** corresponds to the (M+Na<sup>+</sup>) peak. Purity was measured by analytical HPLC at 310 nm; purity for oxime-linked compounds **9-11**, **20-22**, **31-33** and **42-44** included both E and Z isomers.

| Compound | T <sub>m</sub> (°C) | ΔT <sub>m</sub> (°C) | Compound | T <sub>m</sub> (°C) | ΔT <sub>m</sub> (°C) |
|----------|---------------------|----------------------|----------|---------------------|----------------------|
|----------|---------------------|----------------------|----------|---------------------|----------------------|

| Number          |            |      | Number          |            |      |
|-----------------|------------|------|-----------------|------------|------|
| <b>DNA Only</b> | 64.7 ± 0.2 |      | <b>DNA Only</b> | 60.8 ± 0.2 |      |
| <b>1</b>        | 77.1 ± 0.2 | 12.4 | <b>23</b>       | 75.1 ± 0.3 | 14.3 |
| <b>2</b>        | 79.5 ± 0.2 | 14.8 | <b>24</b>       | 78.1 ± 0.2 | 17.3 |
| <b>3</b>        | 77.4 ± 0.2 | 12.7 | <b>25</b>       | 75.1 ± 0.2 | 14.3 |
| <b>4</b>        | 78.2 ± 0.2 | 13.5 | <b>26</b>       | 77.0 ± 0.2 | 16.2 |
| <b>5</b>        | 75.3 ± 0.1 | 10.6 | <b>27</b>       | 72.0 ± 0.3 | 11.2 |
| <b>6</b>        | 76.4 ± 0.2 | 11.7 | <b>28</b>       | 75.0 ± 0.3 | 14.2 |
| <b>7</b>        | 73.7 ± 0.0 | 9.0  | <b>29</b>       | 71.2 ± 0.2 | 10.4 |
| <b>8</b>        | 74.2 ± 0.2 | 9.5  | <b>30</b>       | 71.9 ± 0.2 | 11.1 |
| <b>9</b>        | 76.1 ± 0.2 | 11.4 | <b>31</b>       | 72.3 ± 0.2 | 11.5 |
| <b>10</b>       | 74.1 ± 0.2 | 9.4  | <b>32</b>       | 73.3 ± 0.1 | 12.5 |
| <b>11</b>       | 75.2 ± 0.2 | 10.5 | <b>33</b>       | 73.9 ± 0.3 | 13.1 |
| <b>12</b>       | 66.3 ± 0.2 | 1.6  | <b>34</b>       | 64.4 ± 0.2 | 3.6  |
| <b>13</b>       | 67.8 ± 0.2 | 3.1  | <b>35</b>       | 67.2 ± 0.1 | 6.4  |
| <b>14</b>       | 66.8 ± 0.2 | 2.1  | <b>36</b>       | 59.9 ± 0.2 | -0.9 |
| <b>15</b>       | 68.9 ± 0.0 | 4.1  | <b>37</b>       | 66.1 ± 0.2 | 5.3  |
| <b>16</b>       | 64.8 ± 0.2 | 0.1  | <b>38</b>       | 62.8 ± 0.2 | 2.0  |
| <b>17</b>       | 65.6 ± 0.2 | 0.9  | <b>39</b>       | 64.8 ± 0.2 | 4.0  |
| <b>18</b>       | 65.4 ± 0.2 | 0.7  | <b>40</b>       | 63.4 ± 0.2 | 2.6  |
| <b>19</b>       | 65.2 ± 0.2 | 0.5  | <b>41</b>       | 62.3 ± 0.2 | 1.5  |
| <b>20</b>       | 65.6 ± 0.3 | 0.8  | <b>42</b>       | 63.4 ± 0.0 | 2.6  |
| <b>21</b>       | 65.7 ± 0.2 | 0.9  | <b>43</b>       | 64.8 ± 0.1 | 4.0  |
| <b>22</b>       | 65.5 ± 0.2 | 0.8  | <b>44</b>       | 64.2 ± 0.3 | 3.4  |

**Table SI 2:** Melting temperature and  $\Delta T_m$  values for **1-44** on 14-mer oligonucleotides (oligonucleotide sequences provided in Materials and Methods). All values reported are averages of at least three melting temperature experiments (standard deviations indicated in parentheses.)  $\Delta T_m = T_m(\text{DNA+polyamide}) - T_m(\text{DNA only})$ .

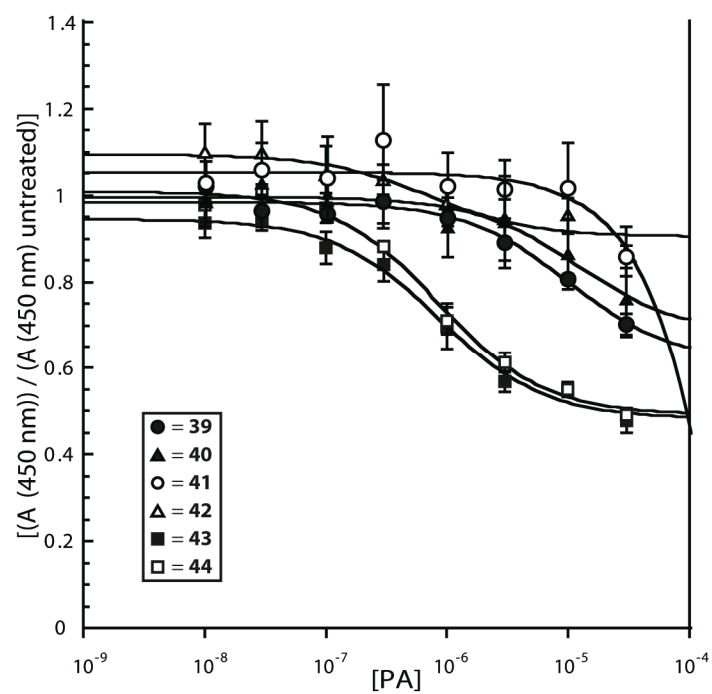

**Figure SI 1:** Cell viability data for **39-44** in LNCaP cells at 30, 10, 3, 1, 0.3, 0.1, 0.03 and 0.01  $\mu\text{M}$ , performed according to the protocol provided in main text.

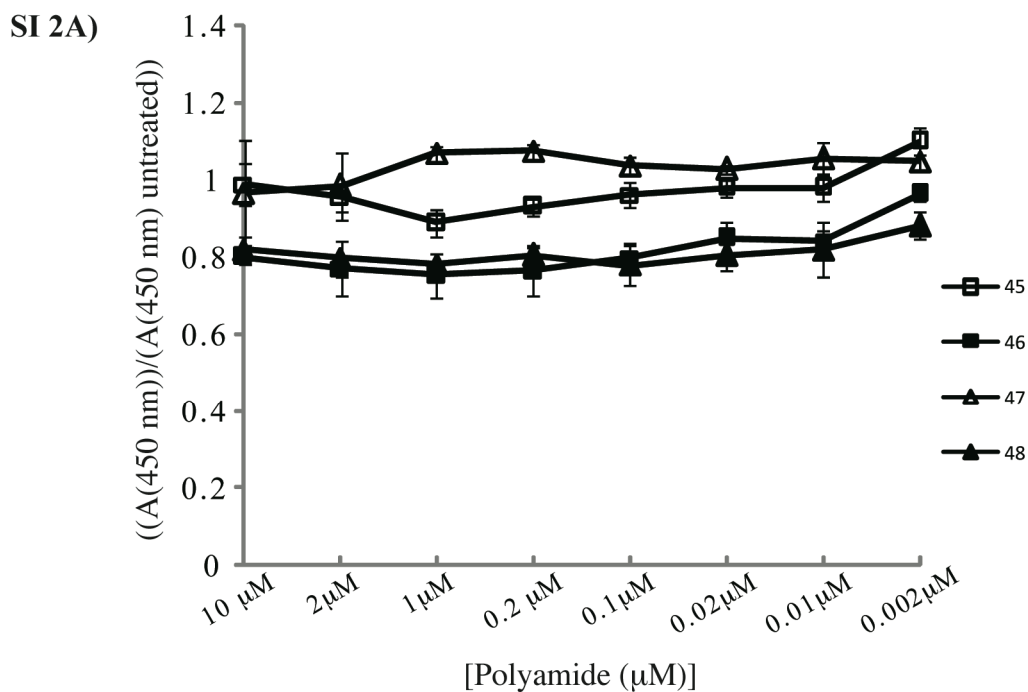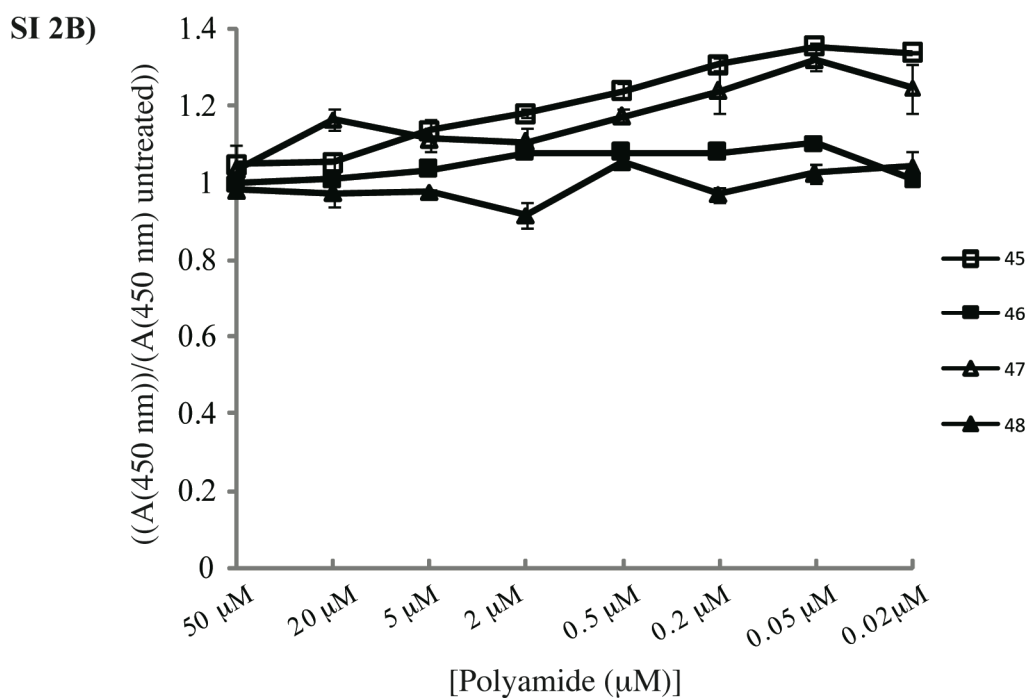

**Figure SI 2:** Cell viability data for **45-48** in U251 and LNCaP cells, performed according to the protocol provided in main text. A) Cell viability data for **45-48** in U251 cells at 10, 2, 1, 0.2, 0.1, 0.02, 0.01 and 0.002  $\mu\text{M}$ . B) Cell viability data for **45-48** in LNCaP cells at 50, 20, 5, 2, 0.5, 0.2, 0.05 and 0.02  $\mu\text{M}$ .
